# Supplementary material for: Impact of combined ischemic preconditioning and remote ischemic perconditioning on ischemia-reperfusion injury after liver transplantation
Source: PubMed Central journal article supplement (PMC6299280; doi:10.1038/s41598-018-36365-5), 2018-12-19

**Impact of combined ischemic preconditioning and remote ischemic preconditioning on ischemia-reperfusion injury after liver transplantation**

Ding-yang Li<sup>a</sup>, Wen-tao Liu<sup>a</sup>, Guang-yi Wang<sup>b</sup>, Xiao-ju Shi<sup>b\*</sup>

<sup>a</sup>Department of Hepatobiliary & Pancreatic Surgery, The First Affiliated Hospital of Zhengzhou University, Zhengzhou 450000, Henan Province, China

<sup>b</sup> Department of Hepatobiliary & Pancreatic Surgery, the First Norman Bethune Hospital Affiliated to Jilin University, Changchun 130021, Jilin Province, China

\* **Corresponding author:** Telephone: +86-13603981433 Fax number: 0371-66279006

**Email :** Ding-yang Li:740086584@qq.com

Wen-tao Liu: 1083931769@qq.com

Guang-yi Wang: aowang6174@yeah.net

Xiao-ju Shi: 978362967@qq.com

Supplemental Figure S1. Uncropped image for NF- $\kappa$ B p65 and  $\beta$ -actin for Figure 4.

The blue boxes show the lanes displayed in Figure 4.

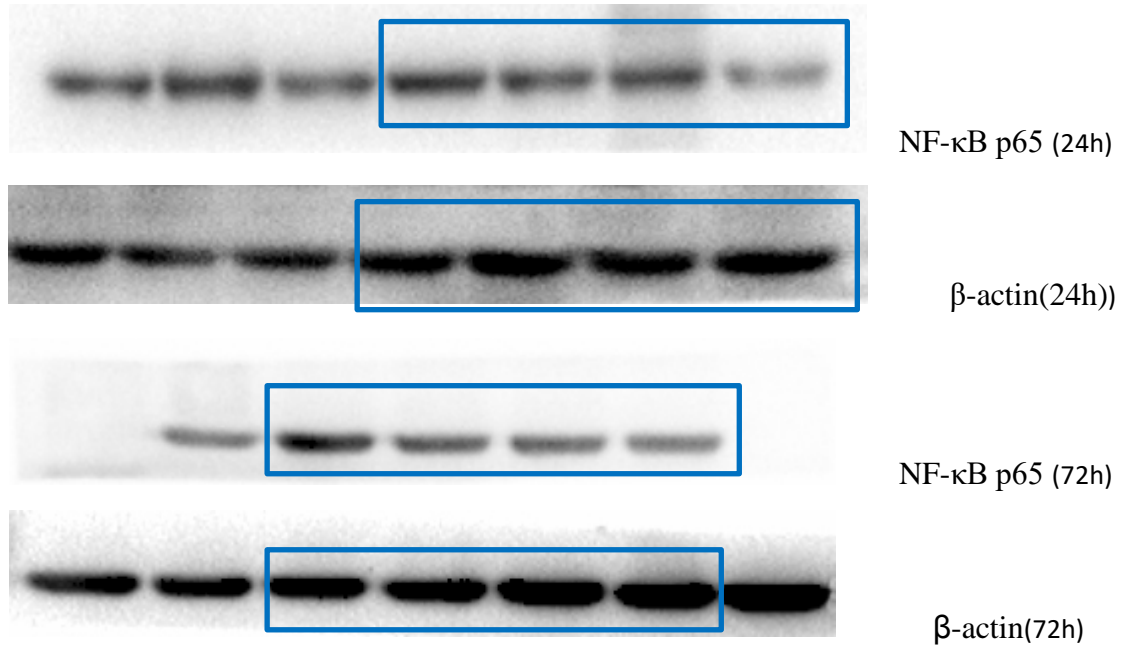

Supplement: 41598_2018_36365_MOESM1_ESM.pdf [file 41598_2018_36365_MOESM1_ESM.pdf]
